# Supplementary material for: A novel ionic liquid polymer material with high binding capacity for proteins
Source: Royal Society of Chemistry journal article supplement (doi:10.1039/c2jm14577d), 2012-01-01
Supplement: c2jm14577d.pdf [file c2jm14577d.pdf]

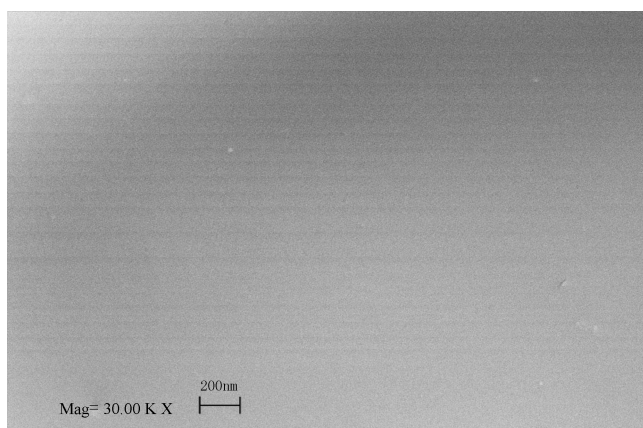

File Name : ESI Figure S1.tif

Caption : SEM image with higher resolution

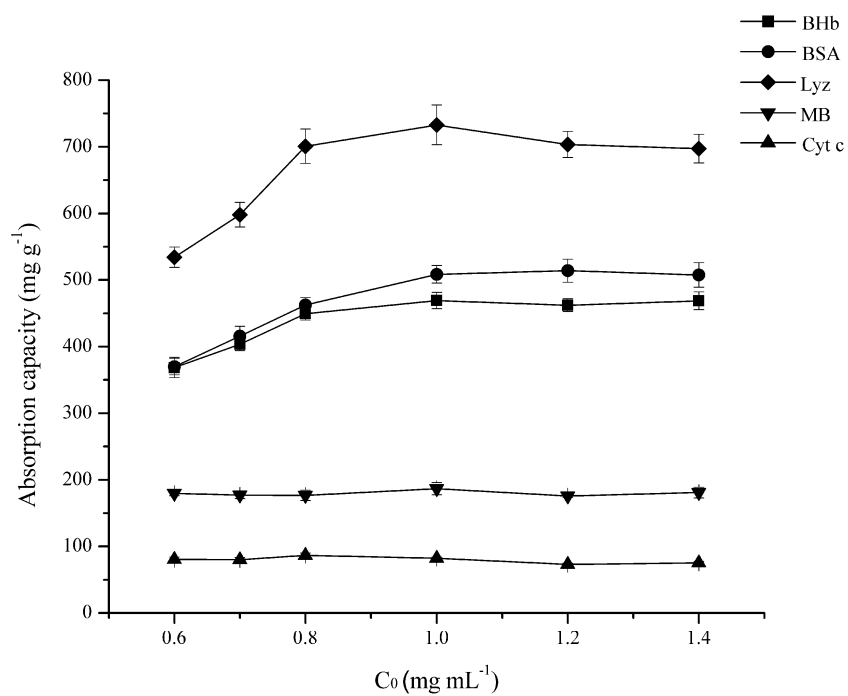

File Name : ESI Figure S2.tif

Caption : the adsorption profiles of five studied proteins
